# Supplementary material
Source: PubMed Central journal article supplement (PMC6375766)
Supplement: NIHMS997082-supplement-1.pdf [file NIHMS997082-supplement-1.pdf]

Supplement:

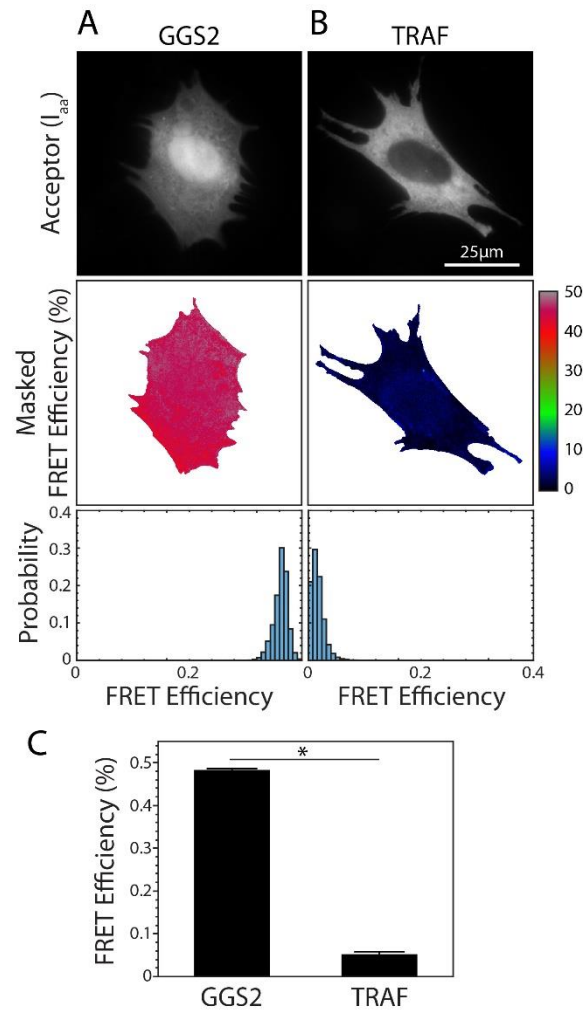

**Supplementary Figure 1:** Sample images, corresponding to **Fig. 1**, of acceptor and the calculated FRET efficiency of vinculin  $-/-$  MEFs expressing cytosolic **(A)** GGS2- and **(B)** TRAF-based constructs. The corresponding pixelwise FRET efficiency distributions are shown for each image. **(C)** Mean FRET efficiency for [D]/[A] filtered GGS2 ( $n = 200$  cells,  $N = 4$  experiments) and TRAF ( $n = 138$ ,  $N = 4$  experiments). Error bars are one standard error of the mean.

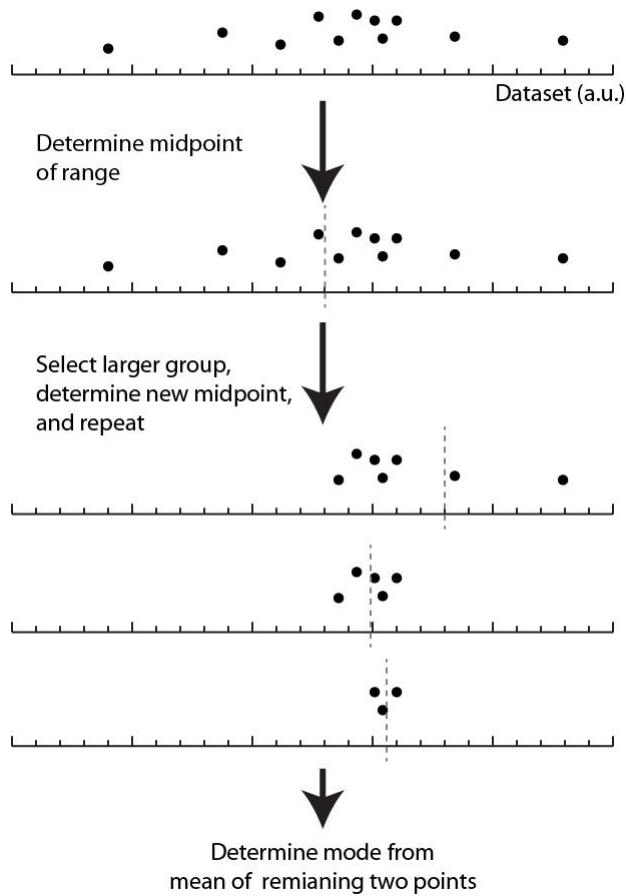

**Supplementary Figure 2:** An illustrative example of determining the mode using the half-range mode algorithm. First, the dataset is divided along the midpoint of the dataset's range. Then, the group with more points is selected. The process of selecting smaller intervals is repeated until only two points remain. The mean of the final two points is considered the mode.

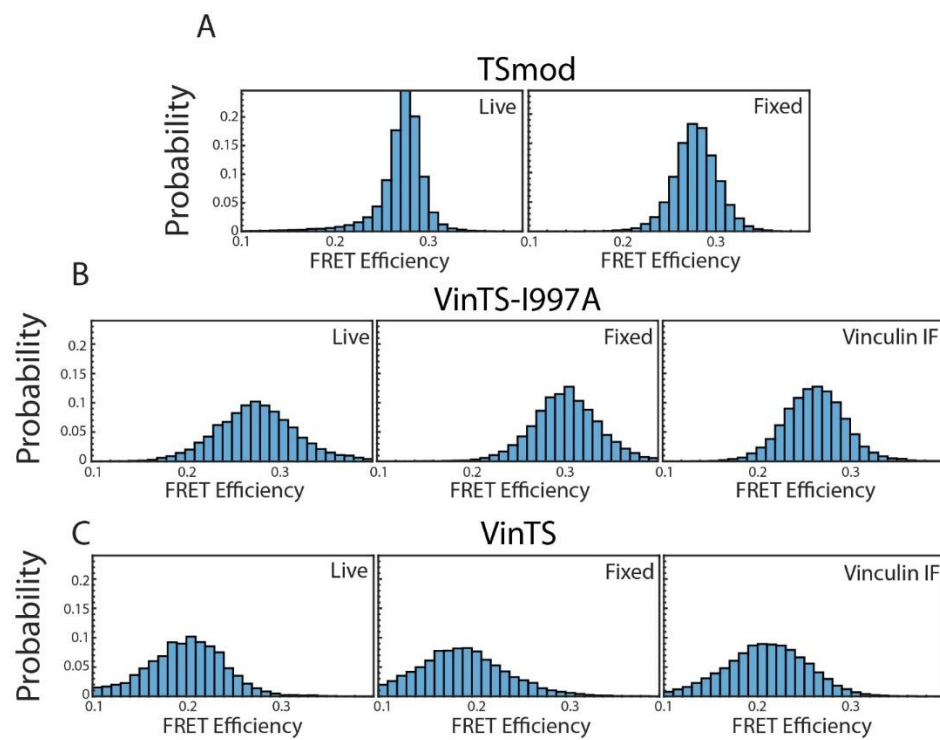

**Supplementary Figure 3:** Pixelwise FRET efficiency histograms that correspond to each sample image shown in Fig. 4 for (A) TsMod, (B) VinTS-I997A, and (C) VinTS.

**Supplementary Table 1:** Primers used in the construction of VinTS dark mTFP1 and VinTS dark Venus.

| <b>Gibson Assembly of VinTS dark mTFP1</b>       |                          |                          |
|--------------------------------------------------|--------------------------|--------------------------|
| Fragment                                         | Primer Name              | Sequence (5' to 3')      |
| Vector1                                          | Ampicillin Reverse       | AGGAGCTAACCGCTTTTTGCACAA |
| Vector1                                          | Dark mTFP1 Forward       | GCGTTCGCCTTAGGCAACAG     |
| Vector2                                          | Ampicillin Forward       | TTGTGCAAAAAGCGGTTAGCTCCT |
| Vector2                                          | Dark mTFP1 Reverse       | CTGTTGCCTAAGGCGAACGC     |
| <b>Gibson Assembly of VinTS dark Venus A206K</b> |                          |                          |
| Fragment                                         | Primer Name              | Sequence (5' to 3')      |
| Vector1                                          | Ampicillin Reverse       | AGGAGCTAACCGCTTTTTGCACAA |
| Vector1                                          | Dark Venus A206K Forward | CCTGGGCTTAGGCCTGCA       |
| Vector2                                          | Ampicillin Forward       | TTGTGCAAAAAGCGGTTAGCTCCT |
| Vector2                                          | Dark Venus A206K Reverse | TGCAGGCCTAAGCCAGG        |

**Supplementary Table 2:** Primers used in the construction of pcDNA3.1 mTFP1-TRAF-Venus.

| <b>Gibson Assembly of pcDNA3.1 mTFP1-TRAF-Venus</b> |                    |                                       |
|-----------------------------------------------------|--------------------|---------------------------------------|
| Fragment                                            | Primer Name        | Sequence (5' to 3')                   |
| Vector1                                             | Venus-TRAF Forward | CCGGACTCAGATCTATGAAGGGCGAGGAGCTGTTACC |
| Vector1                                             | Ampicillin Reverse | AGGAGCTAACCGCTTTTTGCACAA              |
| Vector2                                             | Ampicillin Forward | TTGTGCAAAAAGCGGTTAGCTCCT              |
| Vector2                                             | mTFP1-TRAF Reverse | TCTCCAGGCTCTCTCCGGAGCGGGCCACGGCG      |
| Insert                                              | mTFP1-TRAF Forward | TGGCCCGCTCCGGAGAGAGCCTGGAGAAGAAG      |
| Insert                                              | Venus-TRAF Reverse | TCCTCGCCCTCATAGATCTGAGTCCGGAGGCCCTGT  |

**Supplementary Table 3:** Glossary of symbols used in the calculation of FRET efficiency.

| Symbol   | Definition                                                                                                                                              |
|----------|---------------------------------------------------------------------------------------------------------------------------------------------------------|
| $F_c$    | Corrected FRET, defined as                                                                                                                              |
| $I_f$    | Intensity in the FRET channel                                                                                                                           |
| $I_{dd}$ | Intensity of donor channel                                                                                                                              |
| $I_{aa}$ | Intensity of acceptor channel                                                                                                                           |
| abt      | Acceptor bleedthrough                                                                                                                                   |
| dbt      | Donor bleedthrough                                                                                                                                      |
| G        | Calibration factor that represents a ratio of the sensitized acceptor emission to the amount of donor quenching due to FRET for single chain biosensors |
| k        | Calibration factor that represents the fluorescence intensity ratio between the donor and acceptor in the absence of FRET for single chain biosensors   |
| E        | FRET efficiency                                                                                                                                         |
| [D]      | Donor concentration                                                                                                                                     |
| [A]      | Acceptor concentration                                                                                                                                  |
| [D]/[A]  | Ratio of donor-to-acceptor concentration                                                                                                                |
